# Supplementary material for: Impact of Principal Leadership Styles on Teacher Job Performance: An Empirical Investigation
Source: Frontiers journal article supplement (doi:10.3389/feduc.2022.814159), 2022-05-06
Supplement: Data_Sheet_1.xlsx [file Data_Sheet_1.xlsx]

## Sheet: Sheet1
PROVISION OF TELEPHONE DATA OF SECONDARY SCHOOLS IN FAISALABAD CITY
Sr No.	Name of School	Level	Sub-District	Name of Head Teacher	Mobile No.	School Local No.	Email ID Of School
1	GHS Salarwala	High	Jhumra	MASOOD PERVAIZ	3009664690	418742247	ghssalarwala@gmail.com
2	GHS 124 RB	High	Jhumra		3036429267		ghs124rb@gmail.com
3	GHS 125 RB	High	Jhumra		0321-7458551		ghs125rb@gmail.com
4	GHS 126 RB	High	Jhumra		0343-6188536		ghs126rb@gmail.com
5	GHS 127 RB	High	Jhumra	SHAHID ALI	3456489841		ghs127rb@gmail.com
6	GHS 129 RB	High	Jhumra				ghs129rb@gmail.com
7	GHS 135 RB	High	Jhumra				ghs135rb@gmail.com
8	GHS 136 RB	High	Jhumra				ghs136rb@gmail.com
9	GHS 137 RB	High	Jhumra				ghs137rb@gmail.com
10	GHS 144 RB	High	Jhumra	IFFAT MEHMOOD	3351113105	041-8451500	ghs144fsd@gmail.com
11	GHSS 153 RB	Higher	Jhumra	ASHFAQ AHMADJAVID	0335-1113106	Nil	ghss153rbfsd@gmail.com
12	GGHS 124 RB	High	Jhumra	HINA SARFARAZ	3338965483		gghs124rbpropianfsd@gmail.com
13	GGHS 126 RB	High	Jhumra	Sajida Asif	3346316360	Nil	gghs126rb@gmail.com
14	GGHS 133 RB	High	Jhumra	IMTIAZ SIKHAWAT	3326328277		gghs133rb@gmail.com
15	GGHS 132 RB	High	Jhumra	RAZIA SULTANA	3336508707		gghss132rb@gmail.com
16	GGHS 153 RB	High	Jhumra	ZUBAIDA BEGUM	0321-6666139	NIL	gghs153rb@gmail.com
17	GGHS 135 RB	High	Jhumra	AYESHA KHADIJAH	3326492141	NIL	gghs135rbj@gmail.com
18	GHS 135 RB	High	Jhumra	ZAHOOR UL HASAN	3007230646	NIL	ghs135rb@gmail.com
19	GGHS 130 RB	High	Jhumra	NARGIS SHEHLA	3339945828	NIL	GGHS130@GMAIL.COM
20	GHS 147 RB	High	Jhumra	MUHAMMAD BABAR MUMTAZ	0335-1113117	NIL	ghs147rb@gmail.com
21	GHS 156 RB	High	Jhumra	MAQBOOL AHMAD	3335-1113118	NIL	ghs156rb@gmail.com
22	GGHS 139 RB	High	Jhumra	SADIA NASEEM	0335-1113119	NIL	gghs139rb@gmail.com
23	GGHS 140 RB	High	Jhumra		0321-6261892	NIL	gghs140rb@gmail.com
24	GGHS 148 RB	High	Jhumra	SALMA NASEEM	0335-1113120	NIL	gghs148rb@gmail.com
25	GHSS Chak Jhumra	Higher	Jhumra	MUMTAZ UL HASSAN	0334-6645225	041-8763505	ghssckj@gmail.com
26	GHS 164 RB	High	Jhumra	AHMAD IRFAN BAJWA	0322-4768277	NO PTCL	ghs164rb@gmail.com
27	GHS 188 RB	High	Jhumra	MUHAMMAD SHAFIQUE ANWAR	0300-7676293	041-8451052	ghs188rb@gmail.com
28	GHS 189 RB	High	Jhumra	TARIQ MEHMOOD	0304-0668291	041-4360583	GHS189RB@gmail.com
29	GGHS 155 RB	High	Jhumra	KHADIJA AFTAB	0344-0345154	NO PTCL	gghs155rb@gmail.com
30	GGHS 164 RB	High	Jhumra	SHAISTA TEHSEEN	0334-6205116	NO PTCL	gghs164rb@gmail.com
31	GGHS 188 RB	High	Jhumra	NAHEED CHEENA	0300-7698658	041-8451055	principal.gghs188rb@gmail.com
32	GGHSS 189 RB	Higher	Jhumra	AMBREEN AFZAL	0335-1113128	041-4710585	gghss189rb@gmail
33	GGHSS 190 RB	Higher	Jhumra		0345-8275448		gghss190rb@gmail
34	GGHSS Chak Jhumra	Higher	Jhumra	ZUBAIDA BEGHUM	0321-7532282	041-8761517	gghssckj@hotmail.com
35	GGHS 157 RB	High	Jhumra	MUSSARAT RAFIQ	0322-6321754	041-8450200	gghs157rb@hotmail.com
36	GHS 103 JB	High	Jhumra	MUHAMMAD ARIF ASKARI	0300-7208423	041-8790039	ghs103jb@gmail.com
37	GHS 24 JB	High	Jhumra	KHALID SALEEM	0335-1113132	NO PTCL	ghs24jb@gmail.com
38	GHSS 104 JB	Higher	Fsd. Sadar	ALI RAZA ANJUM	0321-6641153	041-8526123	ghs104jb@gmail.com
39	GGHS 20 JB	High	Jhumra	ANSA MANZOOR	0321-6080620	NO PTCL	gghs20jb@gmail.com
40	GGHS 24 JB	High	Jhumra	SHAGUFTA NAHEED	0300-7913947	041-8701002	gghs24jb@gmail.com
41	GGHS 102 JB	High	Jhumra	SAMINA ISMAIL	0335-6858066	041-8790055	gghs102jb@gmail.com
42	GGHSS 103 JB	Higher	Jhumra	NOREEN ABID	0322-7661816	041-8790587	GGHSS103JB@gmail.com
43	GMCHSS GM abad	Higher	Fsd City	MUHAMMAD ZAHOOR JOHAR	0300-6604016	041-2692500	gmchss.gma@ gmail.com
44	GHS Sher Islamia Narwala	High	Fsd. Sadar	ABDUL NAEEM PERVEZ	0300-7941688	041-8797002	govt.sihs@gmail.com
45	GHS 52 JB	High	Fsd. Sadar	Syed M. Tahir Kazmi	0300-7636311	041-9239133	ghs52jb@gmail.com
46	GHS 58 JB	High	Fsd. Sadar	Asif shahzad	3457772743	418797015	govths58jb@gmail.com
47	GGHS Kaleem Shaheed Colony No.1	High	Fsd City	SHAHIDA PARVEEN	0301-8059079	041-9330379	gghs.ks76@gmail.com
48	GMCGHS Chormajra	High	Fsd City	NABEELA KANWAR	0333-6575841	041-9330371	gmcghs.chour.majra@gmail.com
49	GGHS 58 JB	High	Fsd. Sadar	samra talib	0333-6603188	041-8797003	gghschool58jb.fsd@gmail.com
50	GGHS 124 JB Marzi Pura	High	Fsd City	NAILA ROOHI	0342-4348364	041-2681617	GGHS124JB@GMAIL.COM
51	GGHS 279 RB SA Town	High	Fsd City	NASIRA PARVEEN	0333-1924667	041 9330389	govt.ghs279rb@gmail.com
52	GGHSS Shahi Chowk GM abad	Higher	Fsd City	Nazia Akram	0300-6644583	041-2698600	gghsshahichowkgmabad@gmail.com
53	GHS New Model GM Abad	High	Fsd City	Muhammad Amjad	0300-7211805	041-9330320	GNMHSGMABAD@GMAIL.COM
54	GHS New Colony GM Abad	High	Fsd City	Abdul hameed	0300-6690050	041-9330316	GNEWCHSGMABAD@GMAIL.COM
55	GHS Millat Islamia GM Abad	High	Fsd City	Hamid Mehmood	0322-2402100	041-9330319	GMILLATISLAMIAHS@gmail.com
56	GHS Nia Madrasa GM Abad	High	Fsd City	Liaqat Ali	0343-7713327	041-2690174	GHSNIAMADRISSA@GMAIL.COM
57	GMCHS 123 JB Sidhupura	High	Fsd City	Muhammad Anwar Hussain	0343-7670218	041-9330012	GMCHS.BOYS.SIDHUPURA@GMAIL.COM
58	GMCHS Raza Abad	High	Fsd City	Abdul Ghaffar	0333-9939969	041-9330381	GMCHSRZB@gmail.com
59	GHS Farooq Sheikh Colony	High	Fsd City	Abdul Rauf	0300-7681137	041-9330346	srhmfarooqhsfsd@gmail.com
60	GHS 8 JB	High	Fsd. Sadar	Muhammad Riaz	0302-6050185	041-8586585	ghs8jb@gmail.com
61	GHS Shuhada -E-APS Memorial 279 RB	High	Fsd City	Saghir Ahmad	0334-6512627	041-9330390	GHS279RB@GMAIL.COM
62	GMCGHS GM Abad Shahi Chowk	High	Fsd City	Rakhshanda Akhtar	0336-2591111	041-9330315	MCGIRLS.GMABAD@GMAIL.COM
63	GGHS New Model GM Abad	High	Fsd City	Azmat Nisa	0323-6634369	041-9330321	GGHSNEWMODEL@GMAIL.COM
64	GMCGHS Madina Chowk GM Abad	High	Fsd City	Asif Sultana	0322-6266994	041-2692003	GMCGHSMADINACHOWK@GMAIL.COM
65	GMCGHS Madan Pura	High	Fsd City	Farrukh Naz	0307-7004611	041-9330326	MCGGHS@GMAIL.COM
66	GMCGHS Raza Abad	High	Fsd City	Yasmin Almas	0332-6649746	041-9330391	GOVTMCGHS.RAZA.ABAD@gmail.com
67	MCGHS 123 JB Sidhu Pura	High	Fsd City	Azra Parveen	0321-6612035	041-9330370	MCGGHSSIDHUPURA@GMAIL.COM
68	GGHS 220 RB Reformer	High	Fsd City	Kausar Tasnim	0321-2660027	041-2650660	grghs220rbjudgewala@gmail.com
69	G. Muslim GHS Eid Gah Road	High	Fsd City	MRS NAJMA NAHEED	3351113164	419200847	gmghseidgahrd@gmail.com
70	GHS Islami Madrissa	High	Fsd City	SARFRAZ AHMAD	3007254509	41900378	gislamimadrassahs@gmail.com
71	G. Islamia HS Jinnah Colony	High	Fsd City	ASHFAQ AHMAD	3006601352	041-9200848	gihsjc1@gmail.com
72	GMCHS Islamnagar	High	Fsd City	Ghulam Ghous Tahir	3351113167	041-9330773	gmchsislamnagar123@gmail.com
73	GHS Jamia Chistia	High	Fsd City	MUHAMMAD MUSLIM	3004043918	419210195	gjghschool@gmail.com
74	GGHS Kanik Basti	High	Fsd City	MRS. ASIA BANO	0334-6520834	041-2633628	ghs.kanakbasti@gmail.com
75	GGHS Kinder Garton Eid Gah Road	High	Fsd City	MRS.SUMERA MEHTAB	0321-6671099	041-9201252	gkindargartonghs@gmail.com
76	GGHS Darsgha E Azeem	High	Fsd City	Mrs, Tahira abaida	3336606518	041-9330058	gdarsgahazeem@gmail.com
77	GGHS Shadab Colony	High	Fsd City	UMME SUGHRA YASMEEN	3226278255	041-2551875	gghsshadabcolonyfsd@mailcom
78	GMCGHSS Dijkot Road	Higher	Fsd City	Safia Nasreen	3067097106	041-9200534	gmcghss.dijkotroad@gmail.com
79	GGHS Johar No.2 Gulberg.B	High	Fsd City	MRS.SHAGUFTA ANJUM	0344-7912409	041-9200379	gjoharghsgulberg@gmail.com
80	GGHS Ali Garh Islamnagar	High	Fsd City	MRS. IRAM AZIZ	0335-1113175	041-9210265	gghsaligarh@gmail.com
81	MCGHS No.1 Islamnagar	High	Fsd City	AYESHA ZAIB	3027218515	041-9200524	mcghsislamnagar@gmail.com
82	GGHS 279 RB Sheikh Colony	High	Fsd City	MUBBARRA MUBARIK	3326661619 03351113177	041-9330392	gghs279rb@gmail.com
83	MCGHS 279 RB Kalan	High	Fsd City	TAHIRA PARVEEN	3007984452	419200846	mcghs279rbkalanfsd@gmail.com
84	Govt. Lab HS Samanabad	High	Fsd City	Dr.Muhammad Raza Ahmad	3351113179	419330633	glabhssamanabad@gmail.com
85	G. Comp.HSS Samanabad	Higher	Fsd City	Hafiz Abdul Nasir	3336641842	412660376	gcomphssamanabadfsd@gmail.com
86	MCHS Rasheed Chowk	High	Fsd City	Tasnim Ahmad	3351113181	041-2660350	mchsrasheedchowk@gmail.com
87	GGHS 233 RB	High	Fsd. Sadar	incharge(Sadia Irum - SST)	0333-7779721	041-2566144	gghs233rb@gmail.com
88	GMCGHS Nazimabad	High	Fsd City	FOZIA ANWAR	0335-1113183	041-9331391	gmcghsnazimabadfsd @gmail.com
89	G. Zia GHS Ayyub Resarch	High	Fsd City	Munazza Aziz	0321-9086763	041-2500013	gziaghs.ayubcolony@gmail.com
90	G. Johar GHS 212 RB	High	Fsd City	Sadia Munir	3017188463	041-2638463	gjghs212rb@gmail.com
91	GGHS 222 RB	High	Fsd City	Shaghufta Naheed	3007205550	412404404	gghs222rb@yahoo.com
92	GMCGHSS Samanabad	Higher	Fsd City	Mrs.Mussarat Jabeen Ch	3336725374	419330671	gmcghsss@yahoo.com
93	GHS Samanabad	High	Fsd City	Mr.Tauseef Ahmad	3016733418	419330629	govthssamanabadfsd2gmail.com
94	GMCHS Samanabad	High	Fsd City	Mr.Asif Jahangeer	3016000252	4193330672	ghsmcsamanabad@gmail.com
95	MCHS Millat Colony	High	Fsd City	Mr.Shahid Mahmood	3006623572	412661002	mchsmillatcolonay@yahoo.com
96	G. Deccan GHS Samanabad	High	Fsd City	Mrs.Tahira Deep	3336586085	419330636	g.dghs@hotmail.com
97	GGHSS Allama Iqbal Colony	Higher	Fsd City	Mrs.Ijaz Akhtar	3006630585	412404210	gghsdtypecol@gmail.com
98	G. Johar HS Allama Iqbal Colony	High	Fsd City	Mr.Muhammad Amin Bhatti	3018650655	419330427	gjphsaicfsd@gmail.com
99	MCGHS Millat Colony	High	Fsd City	Mrs.Almas Anjum	3336607907	419330635	mcghs.millatcol@gmail.com
100	MCGHS Nisar Colony	High	Fsd City	Mrs.Noshaba Muzaffar	3007217862	412665566	mcghs.nisarcolony@gmail.com
101	GGHS 232 RB	High	Fsd City	Mrs.Naseem Akhtar	3347757926		gghs232rb@gmail.com
102	GGHS 233 RB	High	Fsd City	Saima Noureen		419239076	gghs233rb@gmail.com
103	GHS Technical Pc.1	High	Fsd City	Dr. Umar Farooq	0300-7271397	9220168	ctsc27.fsd@gmail.com
104	GHS AV Modern Pc.1	High	Fsd City	Gulzar Ahmad/ Tayyab	0300-7975902	9220074	ghsavmodern@gmail.com
105	GHS Rehmania Pc.1	High	Fsd City	Iftikhar Shafiq	0300-7686019, 0333-1925611	9220281	grehmaniahs@gmail.com
106	G. Sabria Sirajia HSS Pc.2	Higher	Fsd City	Rana Muhammad Naseer	0300-7606525	9220080	govt.sshsspc2@yahoo.com
107	MCHS Muhammadi Chowk Pc.2	High	Fsd City	Munir Ahmad	0321-7533681	9220096	ghsmcpc2@gmail.com
108	MCHS 224 RB	High	Fsd City	Muhammad Anwar	0322-8660656	2669490	ghs224rb33110227@gamil.com
109	GGHSS Pc.1	Higher	Fsd City	Mussarat Shamim	0332-6359233	9220073	gghsspc1@gmail.com
110	GGHS Al Karim	High	Fsd City	Mrs.Sidrah-Til-Muntha	0321-7653927	9220291	galkrimghs@gmail.com.
111	GMCGHS B-Block Pc.1	High	Fsd City	MRS. RUKHSANDA CH.	3137622242	9330495	gmcghspc1bblock@gmail.com
112	MCGHS Azafi No.1	High	Fsd City	SHAHNAZ AKHTAR	0321-7851698	9220092	mcghs.azafino1@gmail.com
113	MCGHS Azafi No.2	High	Fsd City	Abdia Baygam	0300-7290424	9220325	mcghs.azafino2@gmail.com
114	GGHS Azafi No.3	High	Fsd City	Mrs. Shahida Tanveer	0335-1113218	9220206	gmcghsazafi3@gmail.com
115	MCGHS Zia Ul Islam Batala Colony	High	Fsd City	Uzma Mah Jabeen	0334-9606198	8541198	gmcghsziaulislam@gmail.com
116	MCGHS Jhal Khanuana	High	Fsd City	IMRANA IQBAL	0321-7831080	9220341	mcghsjhalkhanuana@yahoo.com
117	MCGHS Warispura	High	Fsd City	Tehmim Akhtar	0300-0400223	9220105	mcghswarispura@gmail.com
118	GGHS 224 RB	High	Fsd City	SADAF LATIF	0333-7746664	2669491	gghs224rb@gmail.com,gghs224rb@yahoo.com
119	GMCHSS Allama Iqbal Road	Higher	Fsd City	Muhammad Iqbal Rao	0300-6674241	041-9200021	gmchsskotwaliroadfsd@gmail.com
120	G. LCM HSS	Higher	Fsd City	MUHAMMAD YASIN	0300-7697619	041-922082	GLCMHS@GMAIL.COM
121	G. Sabria Sirajia HS No.1 Sanat Pura	High	Fsd City	ZULFIQAR HUSSAIN	0322-6603400	041-9200845	gsshs1@gmail.com
122	GHS Pak Model	High	Fsd City	SHAMIM MOHY UD DIN	0335-1113227	041-9200380	gpakmodhs@gmail.com
123	G. Muslim HS Tariqabad	High	Fsd City	Muhammad Akhtar	0300-6635946	041-9200022	gmhsfsd@gmail.com
124	MCHS Factor Area	High	Fsd City	MUAZZAM ALI KHAN	0322-6332010	041-9330055	mchsfa@gmail.com
125	MCHS Partapnagar	High	Fsd City	MUHAMMAD AFZAL	0335-6638080	041-9330329	mchspartapnagar@gmail.com
126	GMCGHSS Bhowanabazar	Higher	Fsd City	QAMAR SULTANA	0332-7241300	041-9200020	mcbhawanabazar@hotmail.com
127	GGHS Karkhanabazar	High	Fsd City	MRS. AZRA NAHEED	3007633586	41-9200381	gghs1karkhanabazar@gmail.com
128	GMCGHS Cotton Mills	High	Fsd City	NAZISH NAWAZ	3028665708	041-9330015	gmcghscottonmills@gmail.com
129	MCGHS Partapnagar	High	Fsd City	ROBINA NASREEN	0333-6540522	041-9330328	mcghspartabnagar@gmail.com
130	G. Johar GHS No.1 Nazimabad	High	Fsd City	Mrs.KOUSAR SHAKOOR	0332-6917596	041-9331314	gjouharghsno1@gmail.com
131	GGHS Koh Noor	High	Fsd City	NAHEED KOUSAR	0307-4650711	041-9220079	gkohnoorghs@gmail.com
132	GMCHSS Pc.1	Higher	Fsd City	AMANAT ALI	0321-7859220	041-9220318	gmcmpc1@gmail.com
133	GHS 208 RB	High	Fsd City	MUHAMMAD SARWAR	0300-8579867	041-2426444	ghsrb208@gmail.com
134	GHS 209 RB	High	Fsd. Sadar	PERVAIZ ANWAR	0333-6536066	041-9239156	ghs209rb@hotmail.com
135	GHS 214 RB	High	Fsd City	MUHAMMAD SAJID	0300-6683174	041-9220110	ghs214rb@gmail.com
136	GHS 215 RB	High	Fsd. Sadar	MANZOOR HUSSAIN	0333-8984972	041-9331415	ghs215rb@gmail.com
137	GGHSS Comp Madina Town	Higher	Fsd City	RAIFA SULTANA	0322-7505112	041-9220101	comp.school@hotmail.com
138	GMCGHS X-Block Madina Town	High	Fsd City	KALSOOM AKHTAR	0313-8984439	041-9220036	gmcghsxblock.madinatownfsd@yahoo.com
139	MCGHS Abdullahpur	High	Fsd City	ABIDA PARVEEN	032-7612144	041-9220296	mcghs.abdullahpur@gmail.com
140	GGHS Iqbal Model Tariqabad	High	Fsd City	SHAHEEN AKHTAR	0300-7604048	041-9201022	imghstariqabadfsd@yahoo.com
141	GMCGHS Susan Road	High	Fsd City	NABILA OMER	0334-6544568	041-9220048	GMCGHS.SUSANROAD@gmail.com
142	GMCGHS Pc.1	High	Fsd City	MUSARAT SHARIF	0300-7075962	041-9220077	gmcghspk525@yahoo.com
143	GGHS 208 RB	High	Fsd City	NAHEED ANJUM	0343-7663231	041-2426062	HM208RB@gmail.com
144	GGHS 209 RB	High	Fsd. Sadar	SHAHNAZ KOUSAR	0321-6614063	041-8505097	gghschakno209rb@gmail.com
145	GGHS 214 RB	High	Fsd City	ROBINA KOUSAR	0333-9937950	041-9220091	gghs214rb@gmail.com
146	GGHS 214 RB Himmat Pura	High	Fsd City	HINA YAQOOB	0344-9444666	041-2428080	gghs214rbfsd@gmail.com
147	GGHS 215 RB	High	Fsd. Sadar	MUSARAT AFZA	0301-7185730	041-8777315	gghs215rb@gmail.com
148	GHSS 203 RB Manawala	Higher	Fsd City	MUNIR HUSSAIN	0337-4958134	041-8750016	ghs203rb@gmail.com
149	GHSS City Muslim Amin Town	Higher	Fsd City	MANZOOR AHMAD RAIKHI	0333-6545040	041-9230185	gcmhssfsd@gmail.com
150	GHS 192 RB	High	Fsd. Sadar	RIAZ AHMAD	0333-9805007	041-8791188	ghs192rb@gmail.com
151	GHS 198 RB	High	Fsd. Sadar	AFTAB ALAM	0332-4270505	041-8504121	ghs198rb@gmail.com
152	GHS 204 RB	High	Fsd City	M. ZAHID JAVID	0335-1113257	041-8522838	ghs204rb1@gmail.com
153	GGHS 192 RB	High	Fsd. Sadar	FARKHANDA YASMEEN	0321-9638392	041-8791167	gghs192rb.fsd@gmail.com
154	GGHS 197 RB	High	Fsd. Sadar	Mrs. Najma Gilani	0335-1113259	041-2437110	gghs197rb@yahoo.com
155	GGHS 198 RB	High	Fsd. Sadar	Shamshad Rubana	0307-6011998	041-9239375	gghs198@gmail.com
156	GGHS 199 RB	High	Fsd. Sadar	MRS: ZAHIDA HANIF	0322-6235886	041-8506900	gghs199rb@gmail.com
157	GGHSS 203 RB Manawala	Higher	Fsd City	Safia Khatoon	0334-6545316	041-9330759	gghss203rb@gmail.com
158	GGHS 203 RB Malikpur	High	Fsd City	Mrs. Shaheena Hanif	0342-6396313	041-8752599	gghs203rbmalikpur@gmail.com
159	GGHS 204 RB	High	Fsd City	Mukhtar Begum	0333-1924633	041-8522422	GGHS204RB@gmail.com
160	GHSS Crescent Model	Higher	Fsd City	SAEED AHMAD ZAFAR	0300-6630291	041-9210165	ghscrescent@gmail.com
161	MCHS Gulistan Colony	High	Fsd City	MUHAMMAD SHARIF	0345-7721851	041-9210320	mcgulistancolony@gmail.com
162	G. MM HS Neighebanpura	High	Fsd City	HAFIZ MEHBOOB ALAM	0341-9726936	041-9210211	gmmhsn@gmail.com
163	GGHS Crecent Model	High	Fsd City	GHAZALA YASEEN	0333-6626625	041-9210209	gcmghs@gmail.com
164	GGHS Bhatta Cololny	High	Fsd City	FARZANA TABBASUM	0335-5515353	041-9239243	govts@ymail.com
165	G. MM GHS Neighebanpura	High	Fsd City	AMTUL AMEEN	0301-7271611	041-9210159	gmmghs@gmail.com
166	GGHS Gulistan Colony	High	Fsd City	RUKHSANA ISMAIL	0300-6621203	041-9239134	gghsgulistancolony@gmail.com
167	GMCGHS K-Block Gulistan Colony	High	Fsd City	SHENILA	0342-7799900	041-8783636	gmcghskb@gmail.com
168	GGHS 7 JB Punjwarr	High	Fsd. Sadar	Samina Nazar	0300-5735466	041-8812588	gghs7jbpunjwar@gmail.com
169	GGHS 120 JB	High	Fsd City	SAIMA	0324-7200880	041-9330709	gghs120jbfsd@gmail.com
170	GGHS 121 JB	High	Fsd City	KHALIDA PARVEEN	0313-8756805	041-8766769	gghs121jb@gmail.com
171	GGHS 122 JB	High	Fsd City	SADAF GULZAR	0333-9948855	041-9330772	gghs122jbfsd@gmail.com
172	GGHSS Nishatabad	Higher	Fsd City	Rashida Nawaz	0300-7220059	041-8505859	gghssnishatabad@gamil.com
173	GHS 202 RB Gatti	High	Fsd City	SHOUKAT ALI	0301-6087261	041-9239100	gislamiahsgatti@gmail.com
174	GMCHSS Hajiabad	Higher	Fsd City	NAEEM RASHID	0321-9628053	041-9210160	govtmchsshajiabad@yahoo.com
175	MCGHS Hajiabad	High	Fsd City	Mussarat Khanum	0313-5559883	041-9210163	mcghshajiabad@yahoo.com
176	GGHS Nishatabad	High	Fsd City	Perveen Raza	0323-6044887	041-9330736	gghsnishatabadfsd01@gmail.com
177	GGHS 203 RB Shamsabad	High	Fsd City	Azra Yasmeen	0300-7912918	041-8751244	gghs.203rbshamsabad@gmail.com
178	MCGHS Mansoorabad	High	Fsd City	Samina Saeed	0322-7200073	041-9220373	mcghsfsd@gmail.com
179	GGHS Amin Town	High	Fsd City	Nasreen Kousar	0300-7252625	041-9330731	gghsamintown@gmail.com
180	GGHSS 202 RB Gatti	Higher	Fsd City	Khalida Naheed	0307-4867087	041-9230198	gghs202rb@gmail.com
181	GHS 203 RB Malikpur	high	Fsd City	Muhammad Anwaar	0321-7676990	041-8758679	ghs203rbmalikpur@gmail.com
182	GHS 199 RB	HIGH	Fsd. Sadar	MUSADDIQ ALI	0347-7332139	NA	ghs199rb@gmail.com
183	GHSS DIJKOT	Higher	Fsd. Sadar	M Tufail Principal	0301-7153951	041-2440588	ghssdijkot@gmail.com
184	GHS 252 RB	High	Fsd. Sadar	M Arif sr.HM	0334-6293303	0	ghs252rb@gmail.com
185	GHS 253 RB	High	Fsd. Sadar	Muhammad Javad SSTI/C	0321-9320642	041-2671180	ghs253rb@gmail.com
186	GHS 254 RB	High	Fsd. Sadar	Muhammad Afzal	0300-7907254	041-2679493	ghs254rb@gmail.com
187	GHS 257 RB	High	Fsd. Sadar	Muhammad Shabbir HM	0301-7048349	0	ghs257rb@gmail.com
188	GHS 527 GB	High	Samundri	Liaqat Ali SST I/C	0301-7189047	041-8406222	ghs527gb@gmail.com
189	GGHS 253 RB	High	Fsd. Sadar	Shahida Andeeb sst I/C	0301-7183186	041-2569091	gghs253rb@gmail.com
190	GGHS 257 RB	High	Fsd. Sadar	Yasmin Tufail SST Inchharge	0336-1247247	041-2403638	gghs257rb@gmail.com
191	GGHS 260 RB	High	Fsd. Sadar	Abida Riaz sst incharge	0346-7377101		gghs260rb@gmail.com
192	GGHSS 527 GB	Higher	Samundri	Shahnaz Bano Principal	0321-6886309	041-8406118	gghss527gb@gmail.com
193	GGHSSS Dijkot	Higher	Fsd. Sadar	Rahila Bano principal	0308-7120642	041-2440558	govtghssdijkot@gmail.com
194	GHS 258 RB	High	Fsd. Sadar	Dr M Saeed Sr Headmaster	0322-6310616	041-3400128	ghs258rb@gmail.com
195	GHS 267 RB	High	Fsd. Sadar	Mudassar Farooq SST Incharge	0306-7020815	041-8794067	ghs267rbfsd@gmail.com
196	GHS 275 RB	High	Fsd. Sadar	Muhammad Younas	0307-6099490	041-8528127	ghs275rb@gmail.com
197	GHS 535 GB	High	Fsd. Sadar	Khan Asim Iqbal Headmaster	0346-7766748		ghs535gb@gmail.com
198	GGHSS 267 RB	Higher	Fsd. Sadar	Mamoona Sharif Principal	0332-8161605	041-8794300	gghss267rb@gmail.com
199	GGHS 258 RB	High	Fsd. Sadar	Gulraiz Ghazala I/C HM	0334-1790047	041-3400148	gghs258rb@gmail.com
200	GGHS 265 RB	High	Fsd. Sadar	Anjum Nirala SST Incharge	0301-6862682	041-8794565	gghschool265@gmail.com
201	GGHS 272 RB	High	Fsd. Sadar	Robila Kousar SST I/N	0345-7725672		gghs272rbfsd@gmail.com
202	GGHS 275 RB	High	Fsd. Sadar	Misbah Nazeer SST I/C	0301-6016647		gghs275rb@gmail.com
203	GGHS 535 GB	High	Fsd. Sadar	Sana Tabassum HM	0346-7793310	041-2670780	gghs535gb@gmail.com
204	GHS 239 RB	High	Fsd. Sadar	MUHAMMAD ANWAR BAJWA	3376278400	041-8792278	ghs239rbkhanuana@gmail.com
205	GHS 226 RB	High	Fsd. Sadar	DR. M. ZAFAR IQBAL TAHIR	0301-6002337	041-8777294	ghs226rb@gmail.com
206	GHS 236 RB	High	Fsd. Sadar	MUHAMMAD HUSSAIN	0322 6287595	NIL	ghs236rb@gmail.com
207	GGHS 76 GB	High	Fsd. Sadar	Shazia Parveen	0306-7068877	NIL	ghs76gb@gmail.com
208	GGHS 78 GB	High	Fsd. Sadar	TALAT PERVEEN	3447761218	041-8779488	gghs78gb@gmail.com
209	GGHS 225 RB	High	Fsd City	Mamoona Yasmin	3351113368	041-8777868	gghs225rb@gmail.com
210	GGHS 226 RB	High	Fsd. Sadar	RAFIA SAEED	3351113369	041-9239114	gghs226rb84@gmail.com
211	GHS 91 GB	High	Fsd. Sadar	Muhammad Ishaq	3465773906	041-8510591	ghs91gb@gmail.com
212	GHS 80 GB	High	Fsd. Sadar	Manzoor Hussain	0345-7714441	NIL	ghs80gb@gmail.com
213	GGHS 80 GB	High	Fsd. Sadar	Mahnaz Akram	0300-9652056	NIL	gghs80gb@gmail.com
214	GGHS 85 GB	High	Fsd. Sadar	NAZIMA NAZIR	3351113373	014-8510300	gghs85gbmanpur@gmail.com
215	GGHS 91 GB	High	Fsd. Sadar	Umeesa Mazhar	0306 1616540	041 8510491	gghs91gbfsd@gmail.com
216	GGHSS 242 RB	Higher	Fsd. Sadar	MUNEERA BIBI	0336-7608411	041-2679942	gghss242rb@gmail.com
217	GHS 242 RB	High	Fsd. Sadar	ANWAAR UL HAQ	3006638156	041-2679871	ghs242rb@gmail.com
218	GHS 247 RB	High	Fsd. Sadar	sikandar Zulkarnain	0300-6600364	NIL	ghs247rb@gmail.com
219	GHS 248 RB	High	Fsd. Sadar	DR-SHOUKAT ALI SHOUKAT	0300-7608329	NIL	ghs248rb@gmail.com
220	GGHS 243 RB	High	Fsd. Sadar	Tahira Yasmeen	0333-5269717	NIL	gghs243rb@gmail.com
221	GGHS 247 RB	High	Fsd. Sadar	Shabana Rana	3368521313	041-2679046	gghs247rb@gmail.com
222	GGHS 248 RB	High	Fsd. Sadar	Mussarat Qamar	0300-7983144	041-7983144	gghs248rb@gmail.com
223	GGHS 251 RB	High	Fsd. Sadar	AYESHA SHAHZADI	0333-6198401	041-2566151	gghs251rb@gmail.com
224	GGHS 255 RB Bogan	High	Fsd. Sadar	Saima Rasool	0308-5742363	041-2671617	gghs255rbbogan@gmail.com
225	GGHS 255 RB Nawapand	High	Fsd. Sadar	NADIA RAFIQUE	0300-7219428	NIL	gghs255rbnawanpain@gmail.com
226	GHSS 74 JB	Higher	Fsd. Sadar	CH BABAR MUKHTAR	0300-7615637	041-2555200	hss74jb@gmail.com
227	GHS 41 JB	High	Fsd. Sadar	ISRAR AHMAD	0321-6681267	041-2513041	ghs41jb <ghs41jb@gmail.com>,
228	GGHS 40 JB	High	Fsd. Sadar	IFFAT NASEEM	0341-8776963	nil	gghs40jb@gmail.com
229	GGHS 41 JB	High	Fsd. Sadar	NIGHAT FIRDOUS	0340-7751608	nil	nfirdous41@gmail.com
230	GGHS 71 JB	High	Fsd. Sadar	SUMAIRA AQDAS	0346-7684468	041-2585271	Shamaila Shaukat <gghs71@hotmail.com>,
231	GGHS 73 JB	High	Fsd. Sadar	SHAKEELA NASIM	0333-6720723	041-2585273	gghs.73jb@gmail.com
232	GGHS 271 JB	High	Fsd. Sadar	SIDRA HANIF	0321-6082466	041-8796260	gghs271jb@gmail.com
233	GGHS 272 JB	High	Fsd. Sadar	HADIQA KALYAR	0334-6554373		gghs272jb@gmail.com
234	GGHS 273 JB	High	Fsd. Sadar	SAMINA KOUSAR	0304-4390039	041-2512376	Ishrat Naz <govtghschool273jb@gmail.com>,
235	GGHS 274 JB	High	Fsd. Sadar	DR SAIMA NAHEED	0343-8277794	041-2557515	sara arif <govt.ghs274jb@gmail.com>,
236	GGHSS 66 JB	Higher	Fsd. Sadar	BINNAT UN NISA	0343-7693576	041-9330359	gghs66jb <gghs66jb@gmail.com>,
237	GHS 35 JB	High	Fsd. Sadar	MUHAMMAD ISHAQ	0342-7651585		ghs35jb@gmail.com
238	GHS 60 JB	High	Fsd. Sadar	MUHAMMAD IJAZ	0321-6615247		gov.hs60jb@gmail.com
239	GHS 61 JB	High	Fsd. Sadar	ATHAR KAMRAN GULZAR	0321-6601686		ghs61jb <ghs61jb@gmail.com>,
240	GHSS 66 JB	Higher	Fsd. Sadar	MUHAMMAD RAFIQ	0346-7608859	041-9330358	Muhammad Amjad Shaheen <ghss66JB@gmail.com>,
241	GHS 67 JB	High	Fsd. Sadar	KHALID SAEED	0300-6619232		GHS67JB@gmail.com,
242	GHS 69 JB	High	Fsd. Sadar	MUHAMMAD FAYYAZ	0300-7292654		GHS 69 JB . <ghs69jbfsd@gmail.com>,
243	GGHS 36 JB	High	Fsd. Sadar	NIDA SARFRAZ	0315-2207833		gghs36jb@gmail.com
244	GGHS 60 JB	High	Fsd. Sadar	NAHEED KOUSAR	0347-8754857		gghs60jbfsd@gmail.com
245	GGHS 61 JB	High	Fsd. Sadar	SHAMSHAD BEGUM	0335-6914316		Rana sb <gghs61jb@gmail.com>,
246	GGHS 67 JB	High	Fsd. Sadar	BUSHRA PARVEEN	0346-7238368	041-2558787	Gghs 67jb <gghs67jb@gmail.com>,
247	GGHS 68 JB	High	Fsd. Sadar	HASNAIN YASMEEN	0305-7116215	041-9239220	gghs68jb <gghs68jb@gmail.com>,
248	GGHS 69 JB	High	Fsd. Sadar	NASREEN AKHTAR	0302-7162629		Nasreen Akhtar <gghs69jbfsd@yahoo.com>,
249	GGHS 241 RB	High	Fsd. Sadar	QURAT UL AIN ASLAM	0332-3760114		gghs241rb@gmail.com <gghs241rb@gmail.com>,
250	GGHSS 74 JB	Higher	Fsd. Sadar	SAJIDA NOOR	0300-6618675	041-2585485	gghss.74jb <gghss.74@gmail.com>,
251	GHS 245 RB	High	Fsd. Sadar	ABDUL SATTAR	0300-8463832		ghs245rbboys@gmail.com,
252	GHS 275 JB	High	Fsd. Sadar	MUHAMMAD SARWAR	0302-7933011	041-2557118	HAFIZ FAHEEM <ghs275jbpansera@gmail.com>,
253	GGHS 81 JB	High	Fsd. Sadar	ZARINA KOUSAR	0343-4349980	041-2557012	Sher Sultan <gghs81jb@gmail.com>
254	GGHS 250 RB	High	Fsd. Sadar	ROMANA AKBAR	0308-4978844		gghs250rbbardekay@gmail.com
255	GGHS 276 JB	High	Fsd. Sadar	AZRA DAAR	0346-7684972	041-2574067	gghs276jb@gmail.com,
256	GHS 84 JB	High	Fsd. Sadar	IJAZ FEROZ	0303-6363257		ghs84jb@gmail.com
257	GHS 83 JB	High	Fsd. Sadar	AYYAZ UR REHMAN	0335-1113416		MUHAMMAD ADEEL <ghs83jb@gmail.com>,
258	GHS 259 RB	High	Fsd. Sadar	MUHAMMAD IRSHAAD	0304-5479685		ghs259rb@gmail.com
259	GGHS 78 JB	High	Fsd. Sadar	NASIRA SHABNUM SALEEMI	0346-4048577		gghsjb78@gmail.com
260	GGHS 84 JB	High	Fsd. Sadar	SHAHIDA PARVEEN	0300-7280029		gghs84jb@gmail.com
261	GGHS 85 JB	High	Fsd. Sadar	NASIRA NAHEED	0343-7779367		gghs85jb@gmail.com
262	GGHS 259 RB	High	Fsd. Sadar	RAKHSHAND BEGUM	0346-2892295		gghs259rb@gmail.com
263	GHS 30 JB	High	Fsd. Sadar	Bashir Ahmad	0321-7833603	041-2683009	ghs30jb@gmail.com
264	G. DP HS Narwala	High	Fsd. Sadar	Rana Afzal Mehmood	0333-8990877	041-8797006	govt.dphs59jb@gmail.com
265	GHS 26 JB	High	Fsd. Sadar	M.Abbas Anjum	0349-1654605	041-8704326	ghs26jb@gmail.com
266	GGHS 56 JB	High	Fsd. Sadar	Atifa Iftikhar	0301-6072666		GGHS56jb@gmail.com
267	GGHSS 57 JB	Higher	Fsd. Sadar	Khalida Pareen	0345-7755464		gghss57jb@gmail.com
268	GGHSS 30 JB	Higher	Fsd. Sadar	Anser Shehnaz	0300-6531318	041-2683141	gghss30jb@gmail.com
269	GGHSS 115 JB	Higher	Fsd. Sadar	sarwat naseem	0335-1113428	041-8865233	gghss115jb@gmail.com
270	GHS 111 JB	High	Fsd. Sadar	m. nawaz ch.	0301-7025103	041-8400057	ghs111jb@gmail.com
271	GHS 115 JB	High	Fsd. Sadar	kashif shabeer	0300-7843110	041-8865185	ghs115jb@gmail.com
272	GHS 117 JB	High	Fsd. Sadar	m. ajmal	0334-6504590	041-8404590	govt.hs117jb@gmail.com
273	GHS 119 JB	High	Fsd City	siraj din	0322-6377468	041-9330798	ghs119jb@gmail.com
274	GHS 195 RB	High	Fsd. Sadar	m,asif hafeez	0300-7993060	041-9331715	ghs195rb@gmail.com
275	GGHS 111 JB	High	Fsd. Sadar	sumaira zafar	0333-2636655	041-8400122	gghs111jb@gmail.com
276	GGHS 113 JB	High	Fsd. Sadar	zahra ahmad	0321-7573037	041-8864200	govt.ghs113@gmail.com
277	GGHS 117 JB	High	Fsd. Sadar	nazia musharaf	0300-7989189	041-8404599	gghs117jb@gmail.com
278	GGHS 190 RB	High	Fsd. Sadar	rashida basheer	0332-1604198	041-9330800	gghs190rb@gmail.com
279	GGHS 195 RB	High	Fsd. Sadar	memoona yaqoob	0331-7865864	041-8404242	gghs195rb@gmail.com
280	GGHS 196 RB	High	Fsd. Sadar	mehmooda kalsoom	0332-3844992	041-8767731	govt.ghs196rbw@gmail.com
281	GGHS 2 JB	High	Fsd. Sadar	shagufta aziz	0333-1925809	041-9239158	gghs2jb@gmail.com
282	GHS 2 JB	High	Fsd. Sadar	akhtar ali	0333-6706369	041-8864002	ghs2jb@gmail.com
283	GHS 49 JB	High	Fsd. Sadar	m.zulfiqar ali	0321-6621536	041-8704361	ghs49jb@gmail.com
284	GGHS 7 JB Nalka Kohala	High	Fsd City	shehnaz aashraf	0343-7639106	041-8586156	gghs7jb@gmail.com
285	GGHSS 49 JB	Higher	Fsd. Sadar	munawar yousaf	0312-6696257	041-8704449	gghss49jb@gmail.com
286	GGHS 51 JB	High	Fsd. Sadar	Ghaza ambreen	0336-6573609	041-8586519	gghs51jb2008@gmail.com
287	GHS 45 GB	High	Samundri	ASHRAF ALI ZIA	0321-7535830	0413-224549	ghs45gb@gmail.com
288	GHS 51 GB	High	Samundri	MATHIAS SADIQ	3468635982	0413-417112	gsths51gb@gmail.com
289	GHS 228 GB	High	Samundri	TAHIR MAHMOOD	0333-1925833		ghs228gb@gmail.com
290	GHS 530 GB	High	Samundri	M.MAZHAR IQBAL QAMAR	0345-4440871	NIL	ghs530gb@gmail.com
291	GGHS 228 GB	High	Samundri	SAMINA HASSAN	0322-7750756		gghs228gb@gmail.com
292	GGHS 530 GB	High	Samundri	NASREEN AKHTAR	0334-6292027	NIL	gghs530gb2@gmail.com
293	GGHS 45 GB	High	Samundri	BUSHARA MUSSARAT	0306-8485247	0413-	gghs45gbfsd@gmail.com
294	GHS 47 GB	High	Samundri	MUSHTAQ AHMAD	0333-6692328	NIL	ghs47gb@gmail.com
295	GHS 222 GB	High	Samundri	ARIFALI	0335-1113454	NIL	ghs222gb@gmail.com
296	GGHS 49 GB	High	Samundri	SAIMA BASHIR	0341-6224455	046-3524660	gghs49gb@gmail.com
297	GHS No. 2 Samundri	High	Samundri	TARIQ HUSSAIN	0300-7259356	041-9240092	ghsno2samundri@gmail.com
298	GHS 388 GB	High	Samundri	HAJI M. ASHRAF	0300-7654389	NIL	ghs388gb@gmail.com
299	GHS 390 GB	High	Samundri	Nadeem Ahmad Shahid	0335-1113458	041-3423390	ghs390gb@gmail.com
300	GGHS 136 GB	High	Samundri	SADIA RIAZ CHEEMA	0335-1113459	NIL	136gghs@gmail.com
301	GGHS 388 GB	High	Samundri	TAHIRA YASMIN	0332-7232865	NIL	gghs388gb@gmail.com
302	GGHS 465 GB	High	Samundri	Firdous Kousar	3017064465	Nill	gghs465465@gmail.com
303	GGHS 467 GB	High	Samundri	Zahida Parveen	0335-1113462	041-3425863	hmgghs467gb@gmail.com
304	GGHS No. 2 Samundri	High	Samundri	Rukhsana Rehman	0302-6055474	041-9240060	gghsno2samundri@gmail.com
305	GHS 442 GB	High	Samundri	Nasir Iqbal	0333-8375542	041-3421037	ghs442gla@gmail.com
306	GHS 447 GB	High	Samundri	MUHAMMAD ASHRAF SALEH	0300-7090443	NIL	ghs447gb@gmail.com
307	GGHS 443 GB	High	Samundri	Sadia Ashraf	3351113466	041-3570033	gghs443@gmail.com
308	GGHS 444 GB	High	Samundri	ZAHIDA PARVEEN	3351113467	NIL	gghs444gb@gmail.com
309	GGHS 445 GB	High	Samundri		0345-7762154		gghs445gb@gmail.com
310	GGHSS 447 GB	Higher	Samundri	ALIA BEGUM	3326827356	413213184	gghss447gb@gmail.com
311	GGHS 463 GB	High	Samundri	Nasreen Akhter	0334-7651201	041-3424554	gghs463gb1@gmail.com
312	GHS 440 GB	High	Samundri	QUTAB ALI	0333-4992414	041-3570112	ghs440gb@gmail.com
313	GHS 462 GB	High	Samundri	AKRAM UL HAQ	0335-1113471	041-411462	ghs462gb@gmail.com
314	GHS 463 GB	High	Samundri	FAQIR MUHAMMAD	0345-7590936	041-3422963	ghs463gb@gmail.com
315	GGHS 437 GB	High	Samundri	SAIMA TABASSUM	0334-7475437	NIL	sunshine.shine029@gmail.com
316	GHS No.1 Samundri	High	Samundri	SADAQAT ALI KHAN	0333-6699467	041-9240040	ghsno1samundri@gmail.com
317	GHS 143 GB	High	Samundri	M.RASHEED NAZAMI	0333-0629670	041-3402107	ghs143gb@gmail.com
318	GHS 218 GB	High	Samundri	MAQSOOD HUSSAIN SHAD	0306-7928214		ghs218gb@gmail.com
319	GGHSS 218 GB	Higher	Samundri	SHAGUFTA NAZ	0335-1113477		gghss218gb@gmail.com
320	GGHSS 221 GB	Higher	Samundri	FARZANA KOUSAR	0332-6194979		gghss221gb@gmail.com
321	GGHS 226 GB	High	Samundri	UZMA SHAHZADI	0334-6542299		gghs226gb@gmail.com
322	GGHS 469 GB	High	Samundri	SAJIDA ANJUM	0333-2895212		gghss469gb@gmail.com
323	GGHS No.1 Samundri	High	Samundri	KHALIDA PARVEEN	0306-6087142	041-9240057	gghsno1samundri@gmail.com
324	GHS 135 GB	High	Samundri	M.BOOTA	0301-6050389		ghs135gb@gmail.com
325	GGHS 134 GB	High	Samundri	FOUZIA	0333-8983520		gghs134gb@gmail.com
326	GGHS 477 GB	High	Samundri	ZOHRA	0346-7754088		gghs477gb@gmail.com
327	GGHS 478 GB	High	Samundri			0413-400516	gghs478gb@gmail.com
328	GHS 479 GB	High	Samundri	KHALID ZUBAIR	0333-8934206		ghs479gb@gmail.com
329	GHS 483 GB	High	Samundri	M.RASHID	0346-7279202		ghs483gb@gmail.com
330	GHS 485 GB	High	Samundri	M.HIZBULLAH	0346-6399484		ghs485gb@gmail.com
331	GGHS 478 GB	High	Samundri	FARHAT NAZ	0342-7851469	041-3575218	gghs478gb@gmail.com
332	GGHS 479 GB	High	Samundri		0333-9932917		gghs479gb@gmail.com
333	GGHS 480 GB	High	Samundri	ARRFA	0343-65448512		gghs480gb@gmail.com
334	GGHS 483 GB	High	Samundri	RUBINA KOUSAR	0331-6080305		gghs483gb@gmail.com
335	GGHSS 485 GB	Higher	Samundri	SAIRA REHMAN	3068607646		gghs485gb@gmail.com
336	GGHS 487 GB	High	Samundri	SHAHMIM BANU	0332-6815311		gghs487gb@gmail.com
337	GHS 198 GB	High	Samundri	AMJAD ALI FAROOQ	0335-1113493	04134-72858	gmhs198gb@gmail.com
338	GHS 199 GB	High	Samundri	Khalid Hussain	0333-6602428		hs199gb@gmail.com
339	GHS 200 GB	High	Samundri	Fayyaz Patthan		041-3472057	ghs200gb@gmail.com
340	GHS 206 GB	High	Samundri	NEMATULLAH	0335-1113495		ghs206gb@gmail.com
341	GHS 210 GB	High	Samundri	TAHIR MAHMOOD	0335-1113496		ghs210gb@gmail.com
342	GGHS 197 GB	High	Samundri	SURRIYA WARRAICH			gghs197gb@gmail.com
343	GGHS 198 GB	High	Samundri		0335-1113497		gghs198gb@gmail.com
344	GGHS 199 GB	High	Samundri	RAZIA GILL	0335-1113498		gghs199gb@gmail.com
345	GGHS 203 GB	High	Samundri	Samreen Kokub	0335-1113499	041-3414285	gghs203gb@gmail.com
346	GGHS 204 GB	High	Samundri	RAMLAH MALIK	0335-1113500		gghs204gb@gmail.com
347	GGHS 206 GB	High	Samundri	Sofia Siddique	3351113647	413545073	gghs206@gmail.com
348	GGHSS 210 GB	Higher	Samundri	SHAZIA BANO	0335-1113778		gghss210gb@gmail.com
349	GHS 476 GB	High	Samundri	SHAHID IQBAL	0335-1113800		ghs476gb@gmail.com
350	GHS 215 GB	High	Samundri	AMANAT ALI	0335-1113914		ghs215gb@gmail.com
351	GGHS 213 GB	High	Samundri	RIFFIAT SALEEM	0335-1113915		gghs213gb@gmail.com
352	GGHS 475 GB	High	Samundri	RASHIDA MAQBOOL	0335-1113916		gghs475gb@gmail.com
353	GGHS 192 GB	High	Samundri	AASIA RASUL	0335-1113917		gghs192gb@gmail.com
354	GHS 193 GB	High	Samundri	KHALID MASOOD	0335-1113918		ghs193gbn@gmail.com
355	GHS 492 GB	High	Tandlianwala	MUHAMMAD IQBAL	0335-1113919		ghs492gb@gmail.com
356	GGHS 193 GB	High	Samundri	PERVEEN MAN	0335-1113920	04134-73382	gghs193gb@gmai.com
357	GGHS 195 GB	High	Samundri	GHULSHAN PERVEEN	0335-1113921	04134-72300	gghs195gb@gmail.com
358	GGHS 196 GB	High	Samundri	TEHSIN SADIA HAFEEZ	0335-1113922		gghs196gb@gmail.com
359	GGHS 492 GB	High	Tandlianwala	YASMIN TAHIRA	0335-1113923		gghs492gbfsd@gmail.com
360	GGHS 493 GB	High	Tandlianwala	Bushra Aslam	0335-1113924		gghs493@gmail.com
361	GHS Tariq Colony Mammukanjan	High	Tandlianwala	MUHAMMAD GULZAR	0333-8922752	NA	ghstariqcolony2009@hotmail.com
362	GHS 53/2 GB Tukra	High	Tandlianwala	Muhammad Rafiq	3346393350		ghs53tukra@yahoo.com
363	GHS 505 GB	High	Tandlianwala	Noor Hasan	3336884592	NIL	ghs505gb@gmail.com
364	GHS 491 GB	High	Tandlianwala	MUHAMMAD TARIQ		413479087	ghs491hm@gmail.com
365	GHS 495 GB	High	Tandlianwala	Ahsan Ali	3477549848		ghs495ai@gmail.com
366	GGHSS 509 GB	Higher	Tandlianwala	SHAMIM AKHTAR	0334-4599180	041-3434119	gghs509@gmail.com
367	GHSS 494 GB	Higher	Tandlianwala	GHULAM MUHAMMAD		413431484	ghss494gb@yahoo.com
368	GHSS 495 GB	Higher	Tandlianwala	Ashfaq Mahmood	3338922545		ghss495gb@yahoo.com
369	GHS 507 GB	High	Tandlianwala	ASHIQ ALI	0333-8924660	041-3479070	GHS507GB@GMAIL.COM
370	GHS 508 GB	High	Tandlianwala	MUHAMMAD FAROOQ	0335-1113932	N/A	ghs508gb@gmail.com
371	GHS 509 GB	High	Tandlianwala	M KHALID JAVED		041-3431956	ghs509gb@gmail.com
372	GHS 510 GB	High	Tandlianwala		0336-2525061		ghs510gb@gmail.com
373	GGHS 514 GB	High	Tandlianwala	ALYIA BASHIR	0321-7879380	NA	gghs514gb@gmail.com
374	GHS Garh	High	Tandlianwala	NAIK MUHAMMAD	0335-1113935	NIL	ghsgarh@gmail.com
375	GHS DM Shahana	High	Tandlianwala	ZAHID AZIZ	0335-1113936	NIL	ghsdmshahana@gmail.com
376	GHS 615 GB	High	Tandlianwala	RANA DOST ALI	0335-1113937	NIL	ghs615gb@gmail.com
377	GGHS Garh	High	Tandlianwala	FAREEHA SHABIR	0335-1113938	NIL	garhgghs@gmail.com
378	GHS Killianwala	High	Tandlianwala	IMRAN KHAN	0335-1113939	413214054	ghskillianwala@gmail.com
379	GHS 550 GB	High	Tandlianwala	ABDUL AZIZ AZHAR	0335-1113940	413214450	ghs550gb@gmail.com
380	GGHS 543 GB	High	Tandlianwala	SHAGUFTA PARVEEN		NIL	gghs543gb@gmail.com
381	GGHS 544 GB	High	Tandlianwala		0335-1113941		gghs544gb@gmail.com
382	GGHS 546 GB	High	Tandlianwala	Hashmat Ali			gghs546gb@gmail.com
383	GGHS 549 GB	High	Tandlianwala	SAHER NAZ	0335-1113942	NIL	gghstaimorshah@gmail.com
384	GGHS 550 GB	High	Tandlianwala	SAJIDA BASHIR	0335-1113943	NIL	gghs550gb1@gmail.com
385	GHS Pindi Shikh Musa	High	Tandlianwala	ZULQARNAIN KAMRAN RIZVI	0335-1113944	413412017	ghs.pindisheikhmusa@gmail.com
386	GHS 402 GB	High	Tandlianwala	KHALID HAMEED		NIL	ghs402gb@gmail.com
387	GHS 403 GB	High	Tandlianwala		0335-1113945	NIL	ghs403gb@gmail.com
388	GGHS Pindi Shikh Musa	High	Tandlianwala	RABIA KHATOON	0335-1113946	NIL	gghspindishiekhmusa@gmail.com
389	GGHSS 452 GB	Higher	Tandlianwala	SUMAIRA RASOOL	0335-1113947	413212277	gghs452gb@gmail.com
390	GHS 400 GB	High	Tandlianwala	AZHAR WALAYAT		NIL	ghs400gb@hotmail.com
391	GHS 407 GB	High	Tandlianwala		0335-1113948		ghs407gb@hotmail.com
392	GHS 449 GB	High	Tandlianwala	SAJJID HUSSAIN	0335-1113949	NIL	ghs449gb@gmail.com
393	GHSS 452 GB	Higher	Tandlianwala	MAZHAR HUSSAIN SHAH		413212055	ghss452gb@gmail.com
394	GHSS 453 GB	Higher	Tandlianwala	Syed Shah Sahib	0335-1113950		ghss453gb@gmail.com
395	GHS 455 GB	High	Tandlianwala	IQBAL KHAN		413210445	ghs455gb@gmail.com
396	GHS 468 GB	High	Tandlianwala		0335-1113951		ghs468gb@gmail.com
397	GGHS 400 GB	High	Tandlianwala	KADIJA MEHMOOD	0335-1113952	NIL	gghschool400gb@gmail.com
398	GGHS 451 GB	High	Tandlianwala	FARIHA KANWAL	0335-1113953	NIL	gghs4521gb@gmail.com
399	GGHS 455 GB	High	Tandlianwala		0335-1113954		gghskanjwani@gmail.com
400	GGHS 457 GB	High	Tandlianwala	ASHRAF BIBI		413210619	gghs457gb@gmail.com
401	GGHS 541 GB	High	Tandlianwala	RIFFAT JABEEN	0335-1113955	NIL	gghs541gb@gmail.com
402	GMCHS Tandlianwala	High	Tandlianwala	ABDUL RAHEEM	0332-1716405	041-3442771	gmchighschoolTandlianwala@g mail.com
403	GHS No.1 Tandlianwala	High	Tandlianwala	ABDUL RASHEED TOOR	0333-6606428	041-3441906	ghsno1tandlianwala@gmail.com
404	GHS 423 GB	High	Tandlianwala	MUHAMMAD ALAM	0335-1113958	041-3441640	ghs423gb@gmail.com
405	GGHS 393 GB	High	Tandlianwala	MUSSARAT BIBI	0340-7330722	NIL	gghs393gb@gmail.com
406	GMCGHS Tandlianwala	High	Tandlianwala	MUSSARAT BIBI	0333-8994552	041-3442389	zameerhussainjc426@gmail.com
407	GHS 410 GB	High	Tandlianwala	WASIM RIAZ		NIL	ghs410gb@gmail.com
408	GHS 415 GB	High	Tandlianwala		0333-6691837	NIL	ghs415gb@gmail.com
409	GHS 603 GB	High	Tandlianwala	MAZHER TOOR	0307-5805550	NIL	GHS603@gmail.com
410	GGHS No.2 Tandlianwala	High	Tandlianwala	TAHSINA NAZ TOOR	0300-7646427	041-3441338	gghsno2tandlianwala@gmail.com
411	GGHS 409 GB	High	Tandlianwala	SAMRA KHAN	0300-6699357	041-3441513	GGHS 409 GB
412	GHS Jhamra	High	Tandlianwala	ORANG ZAIB	0300-8325597	NIL	ghsjhaamra@gmail.com
413	GHS 594 GB	High	Tandlianwala	GAZANFAR ALI	0335-1113966	NIL	GHS594GB@gmail.com
414	GGHS Jhumra	High	Tandlianwala	AYESHA ZIA	0335-1113967	NIL	GGHSJHAAMRA@gmail.com
415	GHSS Satiana	Higher	Jaranwala	M. HAFEEZ CH.	3007266720	041-4600418	ghsssatiana@gmail.com
416	GHS 33 GB	High	Jaranwala	SHAFIQ UR REHMAN		041-4600241	ghs33gb@gmail.com
417	GHS 34 GB	High	Jaranwala	AKMAL SHAHZAD BABAR	30114398581	NIL	ghs34gb@gmail.com
418	GHS 35 GB	High	Jaranwala	Rana Iqrar		NIL	ghs35gb@gmail.com
419	GHS 433 GB	High	Jaranwala	SAKHWAT ALI ZIA	3007252835	NIL	ghs433gb@gmail.com
420	GGHSS 39 GB	Higher	Jaranwala	Razia Sultana	3007644054	041-4600406	govtghss39gb@gmail.com
421	GGHSS 167 GB	Higher	Samundri	SAMINA MANZOOR	3017155839	NIL	gghs167gb@gmail.com
422	GGHS 433 GB	High	Jaranwala	SABA NAHEED	3361787434	NIL	gghs433gb@gmail.com
423	GGHS 72 GB	High	Jaranwala	NASIM AKHTAR	3351113975	414795080	gghs72gb@gmail.com
424	GHSS 72 GB	Higher	Jaranwala	abdul wajid	3351111976	414795272	ghss72gb@gmail.com
425	GHS 118 GB	High	Jaranwala	sajid rafique	3351113977	414775092	ghs118gb@gmail.com
426	GGHS 118 GB	High	Jaranwala	saeeda anwar	3351113978	414775192	gghs118gb@gmail.com
427	GHS 172 GB	High	Samundri	TAHIR MUSHTAQ RAI	0346-7616272	041-3773272	ghs172gb@gmail.com
428	GHS 168 GB	High	Samundri	AZIR LUKE GILL	0303-9755007	041-3411200	ghs168gb@gmail.com
429	GHS 170 GB Muazim Ali Khawar Shaheed	High	Samundri	ABDUL HALEEM	0301-6033230		ghs170gb@gmail.com
430	GHS 174 GB	High	Samundri	SHAHID MEHMOOD	0335-1113982		ghs174gb@gmail.com
431	GHS 177 GB	High	Samundri	MUHAMMAD AFZAL	0307-4858177	041-3411456	ghs177gb@gmail.com
432	GHS 429 GB	High	Tandlianwala	ANWAAR HUSSAIN	0345-6622444		ghs429gb@gmail.com
433	GGHS 170 GB	High	Samundri	MUBASHRA SHAMIM AKHTER	0300-9703647		gghs170gb786@gmail.com
434	GGHS 172 GB	High	Samundri	SHAHNAZ KOUSAR	0347-4005168		gsisghs172gb@gmail.com
435	GGHS 174 GB	High	Samundri	ABIDA BATOOL	0335-1113987		gghs174gb@gmail.com
436	GGHS 426 GB	High	Tandlianwala	ZARINA AKHTER	0335-1113988		gghs426tandlianwala@gmail.com
437	GHS 97 RB	High	Jaranwala	MUHAMMAD MUNIR	0321-6628369 0335-1113989	041-4689388	ghs97rb@gmail.com
438	GHS 61 RB	High	Jaranwala	MUHAMMAD KHAN	0342-1464938 0335-1113990	041-4689061	ghs61rb@gmail.com
439	GHS 69 RB	High	Jaranwala	ASIM RASHEED	0301-4498091		ghschool69rb@gmail.com
440	GHS 70 RB	High	Jaranwala	Ansar Ali	0335-1113991		ghschool70rb@gmail.com
441	GHS 91 RB	High	Jaranwala	ARIF HUSSAIN	0345-7670794 0335-1113992		ghs91rb@gmail.com
442	GGHS 61 RB	High	Jaranwala	AZIZ FATIMA	0300-8184639 0335-1113993	041-4213161	gghs61rbfsd@gmail.com
443	GGHS 68 RB	High	Jaranwala	NADIA TASNEEM ALVI	0303-6298747 0335-1113994		gghs68rb@gmail.com
444	GGHS 69 RB	High	Jaranwala	ISMAT BATOOL	0300-7686223 0335-1113995	041-4689223	gghs69rb1@gmail.com
445	GGHS 91 RB	High	Jaranwala	SAJIDA MUKHTAR	0345-7909676 0335-1113996	041-4521191	gghs91rb.dh@gmail.com
446	GGHS 93 RB Chitti	High	Jaranwala	ROBINA KOUSAR	0336-0740808 0335-1113997	041-4521005	gghs93rb@gmail.com
447	GGHS 97 RB	High	Jaranwala	NISHAT SULTANA	0333-8315017 0335-1113998	041-4689088	gghs97rb@gmail.com
448	GHS 58 RB	High	Jaranwala	MUHAMMAD MUKHTAR	0342-8799450 0335-1114061		ghs58rb@gmail.com
449	GHS 55 RB	High	Jaranwala	MUHAMMAD USMAN	0345-7664961 0300-7982088		ghs55rb@gmail.com
450	GHS 65 RB	High	Jaranwala	ZAFARULLAH	0333-8981179 0335-1114063		ghs065rb@gmail..com
451	GGHS 56 RB	High	Jaranwala	SHUMAILA SARWAR	0340-4200725 0335-1114064	041-4675321	gghs56rb1@gmail.com
452	GGHS 151 RB	High	Jaranwala	MUNAZZA SULTANA (SST)	0300-6654668 0335-1114065		gghs151rb@gmail.com
453	GHS 97 GB	High	Jaranwala	MUHAMMAD KASHIF RAZZAQ	0344-7738571 0335-1114066	041-4778289	ghs97gb@gmail.com
454	GGHSS 94 GB	Higher	Jaranwala	SHABANA BABAR	0301-8662790 0335-1114067	041-4778081	gghs94gb@gmail.com
455	GHS 229 RB	High	Jaranwala	MUHAMMAD IKRAM UL HAQ	,03367269345,, 03351114068	041-8740088	ghs229rb@gmail.com
456	GHS RG Colony	High	Fsd. Sadar	Tassawar Hussain	0300-8819740	041-8741486	ghsrgc@gmail.com
457	GHS 108 GB	High	Jaranwala	Muhammad Aslam	3226035742	41477072	ghs108gb@gmail.com
458	GHS 113 GB	High	Jaranwala	ASHAR ALLAH DITTA	3457719984	414798182	ghs113gb@gmail.com
459	GGHS RG Colony	High	Fsd. Sadar	TASNEEM IQBAL.	3004680055	418403557	itincharge2010@gmail.com.
460	GGHS 108 GB	High	Jaranwala	FARHAT JABEEN	3351114073	041-4770282	gghs108gb@gmail.com
461	GGHS 109 RB	High	Jaranwala	TAIBA AROOJ		NIL	gghs109rb@gmail.com
462	GGHS 110 RB	High	Jaranwala		0346-7729615	NIL	gghs110rb@gmail.com
463	GHSS Khurrianwala	Higher	Jaranwala	KHALID MANZOOR	0301-7171187	041-4361011	ghsskhurrianwala@gmail.com
464	GHS 73 RB	High	Jaranwala	ABDUL WAHEED	0300-7986684		ghs73rb@gmail.com
465	GHS 150 RB	High	Jaranwala	MUNIR MASIH	0302-7096016		ghs150rb@gmail.com
466	GHS 200 RB	High	Jaranwala	MUHAMMAD YOUNAS BHATTI	0321-3647209	041-2423848	ghs200rb@gmail.com
467	GHS 206 RB	High	Jaranwala	MUHAMMAD AKRAM	0322-6092516	041-2433552	ghs206rb@gmail.com
468	GGHS 72 RB	High	Jaranwala	NAZEEN RUHI	0305-7733136		gghs72rb@gmail.com
469	GGHS 73 RB	High	Jaranwala	KUBRA BIBI	0306-7215772		gghs73rbtibbi@gmail.com
470	GGHS 200 RB	High	Jaranwala	KHADIJA SUGRA	0333-8967646	041-2423636	gghs200rb@gmail.com
471	GGHSS Khurrianwala	Higher	Jaranwala	ABIDA CH.	3339970921	414360525	gghsskhurrianwala@gmail.com
472	GHS 100 RB	High	Jaranwala	Muhammad Dilshad Majeed	3014425675	414703230	ghs100rb@gmail.com
473	GHS 107 RB	High	Jaranwala	Zahoor Mu Din	3351114085	Nil	ghs107rb@gmail.com
474	GGHS 100 RB	High	Jaranwala	Mrs Bushra Saeed	3028156782		gghs100rb@gmail.com
475	GGHS 102 RB	High	Jaranwala	Mrs. Javed		414703232	gghs102rb@gmail.com
476	GGHS 103 RB	High	Jaranwala	Mariam Zahoor	3351114087	414703220	gghs103rb@gmail.com
477	GHS 101 GB	High	Jaranwala	M Naeem Akhter	306-6010044	414793134	ghs101gbjrw@gmail.com
478	GHS 96 RB	High	Jaranwala	M Safdar Ali	345-4899695	Nil	gphs96rb@gmail.com
479	GHS 104 GB	High	Jaranwala	Mujahid Rasheed	334-6406464	Nil	ghs104gb@gmail.com
480	GGHS 96 RB	High	Jaranwala	Shahnaz Kalsoom	347-7628937	Nil	gghs96rb@gmail.com
481	GGHS 100 GB	High	Jaranwala	Noor Ul Qamar	342-7871104	414793030	gghs100gb@gmail.com
482	GGHS 101 GB	High	Jaranwala	Nayyab Arzoo	304-4900571	414793232	gghs101gb@gmail.com
483	GGHS 104 GB	High	Jaranwala	Sobia Muzaffar	347-0777515	Nil	gghs104gb@gmail.com
484	GHS Lundianwala	High	Jaranwala	MUHAMMAD AFZALL	0300-7276673	041-9237021	ghslundianwala@gmail.com
485	GHSS 562 GB	Higher	Jaranwala	MUHAMMAD YASIN	0305-6222727		ghs562gb@gmail.com
486	GHS 630 GB	High	Jaranwala	ADBUL HAMEED	0345-7908547		ghs630gb@gmail.com
487	GGHSS 586 GB	Higher	Jaranwala	SAMIA CH.	0304-1717826		gghss586gb@gmail.com
488	GHS 653/4 GB	High	Jaranwala	ABDUL SAMAD	0302-3324797		ghs6534gb@gmail.com
489	GGHS 562 GB	High	Jaranwala	MEHER UN NISA	0304-4475922		gghs562gb@gmail.com
490	GGHS 563 GB	High	Jaranwala	NAILA NIAZI	0301-4870077		gghs563gb@gmail.com
491	GHS 363 GB	High	Jaranwala	RAI MOHAMMAD NAWAZ	3351114102	NIL	ghs363b@gmail.com
492	GHS Sial	High	Tandlianwala	IBRAHEEM	3351114103	NIL	ghssialtandliawala@gmail.com
493	GHS Hasokey	High	Tandlianwala	Atique	3351114104	NIL	ghsmozahasokey@gmail.com
494	GHS 275 GB	High	Jaranwala	Zaheer Ahmad Babar	3351114105	NIL	ghs275gb@gmail.com
495	GHS 376 GB	High	Jaranwala	Mehboob Elahe	3351114106	NIL	ghs376gb@gmail.com
496	GGHS 435 GB	High	Jaranwala	Faiza Faima	3351114107	NIL	gghs435gb@gmail.com
497	GHS 378 GB	High	Jaranwala	RIAZ AHAMAD	3351114108	NIL	ghs378gb@gmail.com
498	GHS 364 GB	High	Jaranwala	Mubbasher Rehman	3351114109	NIL	ghs364gb@gmail.com
499	GHS 383 GB	High	Jaranwala	Ameir Ali Zahid	3351114110	NIL	ghs383gb@gmail.com
500	GHS 583 GB	High	Jaranwala	Aohammad Aftab	3351114113	NIL	ghs583gb@gmail.com
501	GHS 282 GB	High	Jaranwala	Nazir Ahmad	3351114114	414631444	ghs282gb@gmail.com
502	GHS 24 GB	High	Jaranwala	BALA KHAN	3351114115	NIL	ghs24gb@gmail.com
503	GHS 29 GB	High	Jaranwala	MOHAMMAD RIAZ	3351114116	NIL	ghs29gb@gmail.com
504	GHS 374 GB	High	Jaranwala	QASIM ALI SHAH	3351114117	NIL	ghs374gb@gmail.com
505	GGHS 283 GB	High	Jaranwala	SADAF GHAFOOR	3351114118	414631185	gghs283gb@gmail.com
506	GGHS 376 GB	High	Jaranwala	KIRAN	3457671335	NIL	gghs376gb@gmail.com
507	GGHS 363 GB	High	Jaranwala	NAZ SIKANDAR	3417727321	NIL	gghs363gb@gmail.com
508	Govt. Islamia HS Jaranwala	High	Jaranwala	javid Bashir	3351114119	41312270	islamiahsjrw@gmail.com
509	GHS 54 GB	High	Jaranwala	M.PERVAZ AKHTAR	0345-7728073	419239192	GHS54GB@GMAIL.COM
510	GHS 61 GB	High	Jaranwala	ALLAH DITTA NAJMI	3067090454	414710151	GHS120GB@gmail.com
511	GHS 237 GB	High	Jaranwala	AHMAD ALI	0335-1114122	NIL	ghs 237gb1@GMAIL.COM
512	GMCGHS Cinema Chowk	High	Jaranwala	Ghazala Bukhari	3351114123		Ghazala Bukhari <mcghs.cinemachowk645@gmail.com>
513	GGHS 55 GB	High	Jaranwala	SHAZIA SHOUKAT	0335-1114124	NIL	gghs55gb@gmail.com
514	GGHS No.2 Jaranwala	High	Jaranwala	Rahat Iqbal	3331925687	414314919	gghsno2jrw@gmail.com
515	GMCGHS No.1 Jaranwala	High	Jaranwala	BILQUEES AKHTAR	0335-1114126	0414-312919	gmcghsjaranwala@gmail.com
516	GHS 353 GB	High	Jaranwala	MUHAMMAD FIAZ AKHTAR	0335-1114127		ghs353gb@gmail.com
517	GGHS 21 GB	High	Jaranwala	MRS ZAHIDA ZARINA KOUSAR	0335-1114128	NIL	gghs21gb@gmail.com
518	GGHS 24 GB	High	Jaranwala	JANAT-UL-FIRDOOS	0335-1114129	041-4620342	gghstwentyfourgb@gmail.com
519	GGHS 240 GB	High	Jaranwala	NIGHAT HAMEED	0335-1114130	0414-313819	gghs240gb@gmail.com
520	GGHS 353 GB	High	Jaranwala	RUBINA KOUSAR	0335-1114131		gghs353gb@gmail.com
521	GGHS Lundianwala	High	Jaranwala	RANI SHGUFTA SULTANA	0336-6803641		gghslundianwala1@gmail.com
522	GHS 566 GB	High	Jaranwala	MUHAMMAD YOUSAF	0344-7642658		ghs566gb@gmail.com
523	GHS 569 GB	High	Jaranwala	TARIQ MEHMOOD	0307-4328423	041-9239205	ghs569gb@gmail.com
524	GHS 644 GB	High	Jaranwala	MUHAMMAD SADIQ	0307-4474962		ghs644gb@gmail.com
525	GGHSS 644 GB	Higher	Jaranwala	NUSRAT BANO	0300-2942981		gghs644gb@gmail.com
526	GHS 657/8 GB	High	Jaranwala	Muhammad shahbaz zafar	3351114137	414392388	ghs6578gb@gmail.com
527	GHS 591 GB	High	Jaranwala	rana muddassar ahmad	3351114138	414392593	gphs591@gmail.com
528	GGHS 624 GB	High	Jaranwala	fakhara niazi	3351114139		gghs624gb@gmail.com
529	GGHS 564 GB	High	Jaranwala	rafaqat perveen	3351114140		gghs564gb@gmail.com
530	GGHS 591 GB	High	Jaranwala	shabana kausar	3351114141	414392293	gghs591@gmail.com
531	GGHS 658/9 GB	High	Jaranwala	isharat perveen	3351114142	414392235	gghs658gb@gmail.com
532	GHSS Awagat	Higher	Jaranwala	MUHAMMAD IRSHAD	3008683195 (03351114143)	419239180	markaz.awagat@gmail.com
533	GHS 105 GB	High	Jaranwala	HAFEEZ ULLAH HAFEEZ	03064807608 (03351114144)	NIL	ghs1ofive@gmail.com
534	GGHS 65 GB	High	Jaranwala	ROBINA SHAHEEN	03338972591 (03351114145)	414797297	gghs65gb@gmail.com
535	GGHS 66 GB	High	Jaranwala	BUSHRA YASMEEN	03137860370 (03351114146)	414797016	gghs66gb2010@gmai.com
536	GGHS 68GB	High	Jaranwala	SHULMILA ANWAR	3083480188 (03351114147)	NIL	govt.ghs68gb@gmail.com
537	GGHS 105 GB	High	Jaranwala	SIDRA NASEEM	03327140678 (03351114148)	NIL	gghs105gb@gmail.com
538	GGHS 109 GB	High	Jaranwala	NEELAM AFZAL	3336811347 (03351114149)	414798168	gghs-109gb@yahoo.com
